# Supplementary material
Source: PubMed Central journal article supplement (PMC3387043)
Supplement: 1200644109_sapp.pdf [file 1200644109_sapp.pdf]

## Supporting information: phylogenetic analysis

### Selected taxa:

We used 28 taxa for this analysis. 26 taxa were selected from the taxon sampling used in the phylogenetic analysis of Beard et al. (1). We augmented the taxon list with *Afrasia djijidae* and *Afrotarsius libycus*. All the taxa are Paleogene fossils with the exception of the platyrrhine *Dolichocebus* which is dated from the early Miocene (2) and the extant *Tarsius*.

### Outgroup taxa (3):

Adapidae: *Leptadapis*, *Adapis*

Notharctidae: *Cantius*

### Ingroup taxa (25):

Omomyidae: *Absarokius*, *Teilhardina americana*, *Shoshonius*, *Hemiacodon*

Tarsiidae: *Xanthorhysis*, *Tarsius*

Eosimiidae: *Eosimias*, *Phenacopithecus*, *Bahinia*

Afrotarsiidae: *Afrasia djijidae*, *Afrotarsius libycus*

Propliopithecidae: *Aegyptopithecus*, *Moeripithecus*

Oligopithecidae: *Catopithecus*

Amphipithecidae: *Myanmarpithecus*, *Pondaungia*, *Siamopithecus*

Platyrrhini: *Dolichocebus*, *Branisella*

Parapithecidae: *Apidium*, *Parapithecus*, *Simonsius*, *Qatrania*, *Biretia*

Proteopithecidae: *Proteopithecus*

### Coding

The coding of the 26 taxa in common with the analysis of Beard et al. (1) remained unchanged from the latter analysis. *Afrasia djijidae* and *Afrotarsius libycus* were newly coded for this manuscript.

### Analysis

The analysis was performed with PAUP 4b10 (3) using a heuristic search (hsearch command) with random step-wise addition (1000 replications with randomized input order of taxa) and tree bisection-reconnection (TBR) branch-swapping options.

### List of Selected Characters for the Cladistic Analysis (316 characters)

Dental, cranial, and postcranial characters and character states used in the phylogenetic analysis. Characters followed by an asterisk are considered “ordered”. The 316 characters of the present analysis were taken without modification from the phylogenetic analysis of Beard et al. (1). A score of “ ? ” is used if information is unavailable due to a lack of material or if the character does not apply to a particular taxon. Tooth areas are calculated as the product of mesiodistal length and buccolingual breadth. Characters were equally-weighted.

### Lower Teeth:

### *Incisors*

1. i1\*. Lower incisor number: 0 = three; 1 = two; 2 = one: I<sub>1</sub> present, I<sub>2</sub> absent; 3 = lower incisors absent.
2. i2. Lower incisor occlusal arrangement: 0 = arcuate battery from lateral perspective (U-shaped arcade); 1 = cusp tips staggered (V-shaped arcade).
3. i3. Lower incisor crown spacing: 0 = no spaces; 1 = spaces present between crowns.
4. i4. I<sub>2</sub>-C diastema: 0 = present; 1 = absent.
5. i5\*. I<sub>1-2</sub> size (ratio of I<sub>1-2</sub> area to M<sub>1</sub> area): 0 = very small ( $\leq 0.69$ ); 1 = moderate sized ( $\geq 0.70, \leq 1.07$ ); 2 = large ( $> 1.07$ ).
6. i6\*. I<sub>1</sub>:I<sub>2</sub> proportions (ratio of I<sub>1</sub> area to I<sub>2</sub> area): 0 = I<sub>1</sub> much smaller than I<sub>2</sub> ( $< 0.65$ ); 1 = I<sub>1</sub> smaller than I<sub>2</sub> ( $\geq 0.65, < 0.82$ ); 2 = I<sub>1</sub> almost as large as I<sub>2</sub> ( $\geq 0.83, < 1.00$ ); 3 = I<sub>1</sub> > I<sub>2</sub> ( $\geq 1.01, < 1.25$ ); 4 = I<sub>1</sub> >> I<sub>2</sub> ( $\geq 1.25$ ).
7. i7\*. I<sub>1</sub> crown width (spatulate incisors only): 0 = considerably wider (m-d) than root (spatulate); 1 = narrow at apex, wider than root; 2 = “styliform” (crown apex approximately the same width as the cervical margin).
8. i8. I<sub>2</sub> crown cross-sectional shape (ratio of m-d length to b-l breadth): 0 = rounded oval ( $\geq 0.64$ ); 1 = mesiodistally compressed ( $< 0.64$ ).
9. i9\*. Lower incisors crown height (crown heights judged from cementoenamel junction to crown tip on the buccal surface): 0 = low crowned; 1 = moderately high crowned; 2 = high crowned.
10. i11\*. Lower incisor roots: 0 = erect or vertical; 1 = slightly procumbent; 2 = very procumbent.
11. i12\*. Lower incisor crowns: 0 = erect or vertical; 1 = procumbent; 2 = very procumbent.
12. i14. I<sub>1</sub> crown shape: 0 = spatulate; 1 = lanceolate, pointed.
13. i15. I<sub>2</sub> heel development (a lingual swelling at the base of crown): 0 = heel absent; 1 = heel present.
14. i17\*. Lower first incisor lingual cingulum: 0 = absent to weak; 1 = strong but incomplete; 2 = strong and complete.
15. i19\*. Relative size of I<sub>1</sub> to M<sub>1</sub> (based on occlusal areas): 0 = I<sub>1</sub> very small (I<sub>1</sub> << M<sub>1</sub>); 1 = moderately enlarged (I<sub>1</sub> < or = M<sub>1</sub>); 2 = grossly enlarged (I<sub>1</sub> > M<sub>1</sub>).

### *Canines*

16. c1\*. Female C<sub>1</sub> cross-sectional area relative to molar cross sectional area: 0 = very small (C<sub>1</sub>/M<sub>1</sub> < 0.40); 1 = moderate ( $\geq 0.4, < 0.80$ ); 2 = large ( $\geq 0.80, \leq 1.20$ ); very large ( $\geq 1.20$ )
17. c2\*. C<sub>1</sub>/I<sub>1</sub> dimorphism (square root of male C<sub>1</sub> area/square root of female C<sub>1</sub> area): 0 = low ( $< 1.07$ ); 1 = moderate ( $\geq 1.07, < 1.17$ ); 2 = high ( $\geq 1.17$ ).
18. c3. C<sub>1</sub> cross-sectional shape: 0 = rounded oval; 1 = mesiodistally compressed; 2 = buccolingually compressed.
19. c4. C<sub>1</sub> lingual crest development: 0 = rounded; 1 = sharp.
20. c5. Canine paracristid (not scored if species has canine incorporated into a tooth comb): 0 = oblique to occlusal plane; 1 = nearly horizontal to occlusal plane; 2 = forms part of cropping mechanism with I<sub>1-2</sub>.
21. c6. Canine height (females): 0 = low, squat; 1 = narrow, short; 2 = tall, at or above tooth row.
22. ML18\*. Lower canine crown: 0 = erect or vertical; 1 = procumbent; 2 = very procumbent.

23. ML19\*. Lower canine root: 0 = erect or vertical; 1 = slightly procumbent; 2 = very procumbent.

*Premolars*

24. p1. P<sub>1</sub><sup>1</sup>: 0 = present; 1 = absent
25. p2. P<sub>2</sub>: 0 = present; 1 = absent.
26. p3. P<sub>2</sub> roots: 0 = single; 1 = double.
27. p4'. P<sub>3</sub> roots: 0 = single; 1 = double.
28. p4''. P<sub>4</sub> roots: 0 = single; 1 = double.
29. p5\*. Premolar crowding (overlapping of crowns): 0 = no crowding; 1 = slightly crowded; 2 = very crowded—mesial root positioned buccal to distal root.
30. p6\*. P<sub>3</sub> paraconid: 0 = large; 1 = small; 2 = absent or extremely small.
31. p7\*. P<sub>4</sub> paraconid: 0 = large; 1 = small; 2 = absent or extremely small.
32. p9'. P<sub>4</sub> paraconid position (mesiodistally): 0 = widely spaced from the metaconid; 1 = twinned with metaconid.
33. p11\*. P<sub>3-4</sub> cristid obliqua: 0 = absent; 1 = weak; 2 = strong.
34. p13. P<sub>2</sub> protoconid height and shape: 0 = slender, projects above protoconids of P<sub>3-4</sub>; 1 = massive, projects above protoconids of P<sub>3-4</sub>; 2 = not projecting, in line with P<sub>3</sub>; 3 = extremely short, shorter than P<sub>3</sub>.
35. p14. P<sub>4</sub> metaconid position: 0 = close to protoconid; 1 = widely spaced from protoconid.
36. p15. P<sub>2</sub> metaconid size: 0 = absent or trace; 1 = small.
37. p16\*. P<sub>3</sub> metaconid size: 0 = absent or trace; 1 = small; 2 = large (as big as protoconid).
38. p17\*. P<sub>4</sub> metaconid size: 0 = absent or trace; 1 = small; 2 = large (as big as protoconid).
39. p18. P<sub>4</sub> trigonid—configuration of lingual wall : 0 = closed; 1 = open.
40. p19. P<sub>3</sub> entoconid and lingual talonid crest: 0 = absent; 1 = lingual talonid crest present but an entoconid does not stand out above it; 2 = entoconid forms a small discrete cusp.
41. p20. P<sub>4</sub> entoconid and lingual talonid crest: 0 = absent; 1 = lingual talonid crest present but an entoconid does not stand out above it; 2 = entoconid forms a small discrete cusp.
42. p21. P<sub>4</sub> lateral and medial protocristid: 0 = continuous between metaconid and protoconid; 1 = discontinuous between metaconid and protoconid.
43. p22. P<sub>3</sub> lateral protocristid orientation: 0 = transversely oriented; 1 = distolingually oriented; 2 = absent.
44. p23. P<sub>4</sub> lateral protocristid orientation: 0 = transversely oriented; 1 = distolingually oriented.
45. p24. P<sub>3-4</sub> posterior trigonid wall: 0 = complete [taxa without metaconids are assigned this character state]; 1 = deeply notched.
46. p25. P<sub>3-4</sub> hypoconid size: 0 = large; 1 = small or absent.
47. p26. P<sub>3-4</sub> hypoconid (or distal terminus of oblique cristid) position: 0 = distal to protoconid; 1 = distal to metaconid, or between protoconid and metaconid
48. p27\*. P<sub>4</sub> hypocristid shearing development: 0 = absent; 1 = weak; 2 = strong.
49. p28\*. P<sub>2</sub> buccal cingulum development: 0 = absent; 1 = incomplete, broken at protoconid and hypoconid; 2 = complete.
50. p29\*. Lower premolar inflation: 0 = not basally inflated; 1 = slightly basally inflated; 2 = very basally inflated.
51. p30\*. P<sub>4</sub> exodaenodonty: 0 = not exodaenodont; 1 = slightly exodaenodont; 2 = very exodaenodont.

52. p31\*. P<sub>4</sub> talonid length (ratio of midline m-d length of trigonid to m-d length of talonid): 0 = extremely short or non-existent (tri:tal  $\geq$  1.61); 1 = short (much shorter than trigonid) (tri:tal  $\geq$  1.27, < 1.61); 2 = equal or slightly shorter in length to trigonid (tri:tal  $\geq$  0.92, < 1.27); 3 = talonid longer than trigonid (tri:tal < 0.91).
53. p33\*. Premolar orientation: 0 = Crown bases vertical in lateral perspective; 1 = slightly oblique; 2 = strongly oblique, projecting medial over the anterior.
54. p34. P<sub>4</sub> anterobuccal cingulum development: 0 = absent or trace; 1 = strong.
55. p36\*. P<sub>4</sub> postprotoconid ridge: 0 = weak or absent; 1 = moderate; 2 = very strong.
56. p37\*. P<sub>4</sub> postmetaconid ridge: 0 = weak or absent; 1 = moderate; 2 = very strong.
57. p40\*. P<sub>4</sub> paraconid height: 0 = low; 1 = moderate; 2 = high (nearly as high as protoconid).
58. p41\*. P<sub>3-4</sub> protoconid height: 0 = P<sub>3</sub> much lower than P<sub>4</sub>; 1 = P<sub>3</sub> slightly lower than P<sub>4</sub>; 2 = P<sub>3</sub> equal in height to P<sub>4</sub>; 3 = P<sub>3</sub> higher than P<sub>4</sub>.
59. p42\*. P<sub>3</sub> to P<sub>4</sub> area: 0 = 0.45-0.59; 1 = 0.60-0.69; 2 = 0.70-0.79; 3  $\geq$  0.80.
60. p43\*. P<sub>4</sub> m-d L/ b-l W: 0 = (< 0.95); 1 = ( $\geq$  0.96, < 1.14); 2 = ( $\geq$  1.15, < 1.20); 3 = ( $\geq$  1.21, < 1.35); 4 = ( $\geq$  1.36, < 1.46); 5 = (> 1.47).
61. p44\*. Ratio of P<sub>4</sub> area to M<sub>1</sub> area: 0 = (< 0.62); 1 = ( $\geq$  0.63, < 0.72); 2 = ( $\geq$  0.73, < 0.82); 3 = ( $\geq$  0.83, < 0.92); 4 = ( $\geq$  0.93, < 1.02); 5 = (> 1.03).
62. p45. P<sub>3-4</sub> root orientation: 0 = P<sub>3-4</sub> roots aligned mesiodistally; 1 = P<sub>3</sub> root shifted laterally, P<sub>4</sub> mesial root aligned mesiodistally; 2 = P<sub>3</sub> roots aligned mesiodistally, P<sub>4</sub> mesial root shifted laterally. [Scored as missing if roots are single].

#### *Molars*

63. m4. M<sub>3</sub> root number: 0 = one; 1 = two.
64. m6\*. M<sub>2</sub> trigonid width (ratio of buccolingual breadths of trigonid and talonid): 0 = much wider than talonid ( $\geq$  1.11); 1 = widths similar (< 1.11, > 0.90); 2 = much narrower than talonid ( $\leq$  0.90).
65. m7\*. M<sub>3</sub> trigonid width (based on relative buccolingual breadths): 0 = much wider than talonid ( $\geq$  1.20); 1 = trigonid and talonid widths similar ( $\leq$  1.20-1.05); 2 = trigonid narrower than talonid (< 1.05).
66. m8'. M<sub>1</sub> paraconid position: 0 = mesiolingual, between protoconid and metaconid; 1 = mesial to metaconid.
67. m9'. M<sub>2</sub> paraconid position: 0 = mesiolingual, between protoconid and metaconid; 1 = mesial to metaconid.
68. m10. M<sub>3</sub> paraconid position: 0 = mesiolingual, between protoconid and metaconid; 1 = mesial to metaconid.
69. m8-9-10'. M<sub>2-3</sub> paraconid location: 0 = widely spaced from the metaconid; 1 = twinned with metaconid.
70. m11. M<sub>1</sub> parastylid (= premetacristid): 0 = absent; 1 = present.
71. m12\*. Molar metastylids (postmetacristids): 0 = absent; 1 = small; 2 = large.
72. m13. M<sub>3</sub> hypoconulid: 0 = single; 1 = double
73. m14\*. M<sub>3</sub> heel: 0 = absent; 1 = narrower than talonid; 2 = approximately equal in width to talonid.
74. m15\*. Molar enamel surface: 0 = smooth; 1 = slightly crenulated; 2 = highly crenulated.
75. m16\*. M<sub>1</sub> trigonid height (ratio of trigonid height to talonid height measured on the buccal aspect of the crown): 0 = higher than talonid ( $\geq$  1.20); 1 = slightly higher than talonid ( $\geq$  1.10, < 1.20); 2 = trigonid and talonid of similar height (< 1.10).
76. m17. M<sub>1-2</sub> cusp relief: 0 = moderate to high; 1 = low.

77. m18.  $M_1$  trigonid lingual configuration: 0 = open; 1 = closed.
78. m19.  $M_1$  metaconid position: 0 = transversely aligned—lingual to protoconid; 1 = slightly distolingual to protoconid.
79. m20\*.  $M_2$  paraconid development: 0 = absent; 1 = small; 2 = large.
80. m21.  $M_{1-2}$  lateral protocristid orientation: 0 = runs toward metaconid; 1 = runs toward hypoflexid.
81. m22.  $M_1$  distal trigonid wall: 0 = complete; 1 = deeply notched by protoconid/metaconid sulcus; 2 = medial and lateral protocristid do not meet but no sulcus is visible.
82. m23.  $M_2$  distal trigonid wall: 0 = complete; 1 = deeply notched by protoconid/ metaconid sulcus; 2 = medial and lateral protocristid do not meet but no sulcus is visible.
83. m24.  $M_{1-3}$  wear facet X: 0 = present; 1 = absent.
84. m25\*.  $M_{1-2}$  entoconid: 0=barely stands out on lingual talonid marginal crest; 1 = a small discrete cusp; 2 = a large cusp.
85. m26\*.  $M_{1-2}$  postentoconid sulcus: 0 = prominent; 1 = faintly visible; 2 = absent.
86. m27\*.  $M_1$  hypoconulid size: 0 = large; 1 = moderate; 2 = small; 3 = absent.
87. m28\*.  $M_2$  hypoconulid size: 0 = large; 1 = moderate; 2 = small; 3 = absent.
88. m29\*.  $M_3$  hypoconulid size: 0 = large; 1 = moderate; 2 = small; 3 = absent.
89. m30\*.  $M_{1-2}$  hypoconulid position: 0 = twinned to entoconid; 1 = near midline; 2 = slightly buccal to midline.
90. m31\*.  $M_{1-2}$  cristid obliqua development: 0 = weak (rounded); 1 = strong (trenchant); 2 = very strong (trenchant).
91. m32\*.  $M_1$  cristid obliqua orientation: 0 = reaches trigonid wall at a point distal to protoconid; 1 = reaches trigonid wall at a point distolingual to protoconid; 2 = reaches trigonid wall at a point distal to metaconid.
92. m33\*.  $M_2$  cristid obliqua orientation: 0 = reaches trigonid wall at a point distal to protoconid; 1 = reaches trigonid wall at a point distolingual to protoconid; 2 = reaches trigonid wall at a point distal to metaconid.
93. m34.  $M_1$  cristid obliqua terminus: 0 = runs to base of trigonid; 1 = runs part way up the distal trigonid wall; 2 = connects with protoconid tip or protocristid; 3 = connects with metaconid.
94. m35.  $M_2$  cristid obliqua terminus: 0 = runs to base of trigonid; 1 = runs part way up the distal trigonid wall; 2 = connects with protoconid tip or protocristid; 3 = connects with metaconid.
95. m36.  $M_3$  cristid obliqua terminus: 0 = runs to base of trigonid; 1 = runs part way up the distal trigonid wall; 2 = connects with protoconid tip or protocristid; 3 = connects with metaconid.
96. m37.  $M_{1-2}$  centroconid development: 0 = present; 1 = absent.
97. m38\*.  $M_{1-2}$  hypocristid development: 0 = absent or seen only as a trace; 1 = weak; 2 = strong.
98. m39\*.  $M_3$  hypocristid development: 0 = absent or seen only as a trace; 1 = weak; 2 = strong.
99. m40\*. Lingual configuration of  $M_{1-2}$  talonid: 0 = open; 1 = notched lingually but not open; 2 = closed.
100. m41.  $M_{1-2}$  distal fovea: 0 = absent; 1 = present (weak); 2 = present (large).
101. m42.  $M_{1-2}$  hypocristid configuration: 0 = simple; 1 = with accessory cusp close to hypoconid.

102. m43.  $M_{1-2}$  cristid obliqua: 0 = notched; 1 = straight.
103. m44\*. Molar cusp inflation: 0 = cusps not inflated, marginally positioned; 1 = slightly inflated; 2 = very inflated.
104. m45\*.  $M_{1-2}$  buccal cingulum development: 0 = absent to trace; 1 = partial, broken at protoconid and hypoconid; 2 = complete.
105. m46\*.  $M_1$  hypoflexid depth: 0 = very shallow; 1 = moderate; 2 = deep.
106. m47\*.  $M_2$  hypoflexid depth: 0 = very shallow; 1 = moderate; 2 = deep.
107. m53\*. Ratio of  $M_2$  length to  $M_3$  length: 0 =  $M_3$  much longer than  $M_2$  (0.71-0.80); 1 =  $M_3$  longer than  $M_2$  (0.81-0.90); 2 =  $M_3$  equal than  $M_2$  (0.91-1.00); 3 =  $M_3$  smaller than  $M_2$  (1.01-1.12); 4 =  $M_3$  much smaller than  $M_2$  ( $\geq 1.13$ ); 5 = if  $M_3$  absent.
108. m55\*.  $M_1$  mesiodistal length/buccolingual breadth: 0 = 1.0-1.15; 1 = 1.16-1.22; 2 = 1.23-1.32; 3 =  $> 1.33$ .
109. m56. Convergence of buccal and lingual molar cusp walls: 0 = convergent; 1 = vertically sided.
110. m57.  $M_{1-2}$  entoconid position relative to hypoconid: 0 = transverse to hypoconid; 1 = distal to hypoconid.
111. ML88\*.  $M_{1-3}$  Pre-entocristid: 0 = indistinct to absent; 1 = weakly developed (low); 2 = well-developed (strong and high).

### Upper Teeth:

#### *Incisors*

112. I1\*.  $I^1-I^2$  interstitial contact: 0 = absent; teeth widely spaced; 1 = present as narrow contact; 2 =  $I^2$  tightly packed against  $I^1$ ,  $I^1$  preparacrista abbreviated.
113. I2.  $I^1-I^1$  interstitial contact: 0 = present; 1 = absent: a wide space occurs in the midline between these teeth.
114. I3.  $I^2-C$  diastema: 0 = present; 1 = absent.
115. I4\*.  $I^1$  area: $I^2$  area: 0 = areas approximately equal ( $\leq 1.00$ ); 1 =  $I^1$  slightly larger than  $I^2$  ( $> 1.00, < 1.40$ ); 2 =  $I^1$  much larger than  $I^2$  ( $> 1.40$ ).
116. I5\*.  $I^1$  size ( $I^1$  area:  $M^1$  area): 0 = incisor small ( $\leq 0.50$ ); 1 = incisor moderate ( $> 0.50, < 0.56$ ); 2 = incisor large ( $\geq 0.56$ ).
117. I6\*.  $I^1$  occlusal shape (mesiodistal length/buccolingual breadth): 0 = rounded oval ( $< 1.05$ ); 1 = buccolingually compressed ( $> 1.05, < 1.30$ ); 2 = extremely compressed ( $> 1.30$ ).
118. I7\*.  $I^2$  occlusal shape (mesiodistal length /buccolingual breadth): 0 = rounded oval ( $\leq 1.05$ ); 1 = slightly buccolingually compressed ( $> 1.05, < 1.30$ ); 2 = extremely buccolingually compressed ( $\geq 1.30$ ).
119. I10.  $I^1$  occlusal edge orientation (for spatulate incisors only; all others scored as “?”): 0 = occlusal edge orthogonal to long axis of root; 1 = occlusal edge wears at a steep angle to long axis of root; 2 = crown with pronounced mesial asymmetry (= mesial process) in unworn state.
120. I11.  $I^{1-2}$  lingual cingulum: 0 = moderate, continuous; 1 = strong.
121. I12.  $I^1$  basal lingual cusp: 0 = absent; 1 = present.
122. I13.  $I^1-I^2$  buccal cingulum: 0 = absent; 1 = present.

### *Canines*

123. C1. C<sup>1</sup> cross-sectional shape: 0 = oval; 1 = rounded.
124. C2\*. Upper canine occlusion: 0 = C<sup>1</sup> wears against P<sub>1-2</sub>; 1 = C<sup>1</sup> wears against P<sub>2</sub>; 2 = C<sup>1</sup> wears against P<sub>2-3</sub>; 3 = C<sup>1</sup> wears against P<sub>3</sub>.
125. C3. C<sup>1</sup> mesial groove (females): 0 = shallow or absent; 1 = deep.
126. C4\*. C<sup>1</sup> lingual cingulum: 0 = weak or absent; 1 = strong; 2 = very strong.

### *Premolars*

127. P1\*. P<sup>2</sup> root number: 0 = one (if tooth is absent, taxon scored " 0 "); 1 = two; 2 = three.
128. P2. P<sup>3</sup> root number: 0 = two; 1 = three.
129. P3. P<sup>4</sup> root number: 0 = two; 1 = three.
130. P4\*. Ratio of P<sup>2</sup> area to P<sup>3</sup> area: 0 = P<sup>2</sup> much smaller ( $\leq 0.85$ ) (if tooth is absent, taxon scored " 0 "); 1 = P<sup>2</sup> smaller ( $> 0.85, < 0.95$ ); 2 = P<sup>2</sup> equal ( $\geq 0.95$ ); 3 = clearly larger.
131. P5\*. Ratio of P<sup>4</sup> area to M<sup>1</sup> area: 0 = P<sup>4</sup>  $\ll$  M<sup>1</sup> ( $\leq 0.66$ ); 1 = P<sup>4</sup>  $<$  M<sup>1</sup> ( $> 0.66, \leq 0.76$ ); 2 = P<sup>4</sup> = M<sup>1</sup> (0.77-1.05); 3 = P<sup>4</sup>  $>$  M<sup>1</sup> ( $> 1.06$ ).
132. P6. P<sup>2</sup> occlusal outline: 0 = triangular; 1 = suboval with the long axis b-l; 2 = suboval with the long axis m-d; 3 = round.
133. P7. P<sup>4</sup> occlusal outline: 0 = triangular; 1 = suboval; 2 = squared.
134. P8. P<sup>3-4</sup> trigon/talon proportions: 0 = trigon  $>$  talon; 1 = trigon  $<$  talon.
135. P9. P<sup>3</sup> protocone: 0 = present; 1 = absent.
136. P10. P<sup>4</sup> metacone: 0 = absent; 1 = present.
137. P11. P<sup>4</sup> protocone: 0 = low relative to paracone; 1 = high relative to paracone.
138. P12. P<sup>2</sup> protocone: 0 = present; 1 = absent (if tooth absent, taxon scored " 1 ").
139. P13'. P<sup>2</sup> hypocone: 0 = absent; 1 = present.
140. P14\*. P<sup>4</sup> paraconule: 0 = large; 1 = small; 2 = absent.
141. P15. P<sup>3-4</sup> parastyles: 0 = present; 1 = absent.
142. P16. P<sup>3-4</sup> metastyles: 0 = absent; 1 = present.
143. P17. P<sup>3-4</sup> postprotocrista: 0 = strong; 1 = weak, short.
144. P18. P<sup>2-3</sup> distal crown margin: 0 = smoothly rounded; 1 = waisted between buccal and lingual cusps.
145. P19. P<sup>3-4</sup> lingual cingulum: 0 = absent or weak; 1 = strong.
146. P20. P<sup>3</sup> metacone: 0 = absent; 1 = present
147. P21. P<sup>3-4</sup> buccal cingulum development: 0 = absent or weak; 1 = strong.
148. ML126\*. P<sup>4</sup> hypocone: 0 = minute to absent; 1 = present but small; 2 = strong.
149. ML127\*. P<sup>3</sup> hypocone: 0 = minute to absent; 1 = present but small; 2 = strong.

### *Molars*

150. M1\*. M<sup>1-2</sup> root number: 0 = three, three; 1 = three, two; 2 = two, two.
151. M2\*. M<sup>3</sup> root number: 0 = three; 1 = two; 2 = one.
152. M3\*. M<sup>2</sup> shape (bl/md): 0 = very transverse ( $> 1.65$ ); 1 = transverse ( $< 1.65, > 1.30$ ); 2 = squared ( $\leq 1.30$ ).

153. M4\*. Ratio of  $M^1$  area to  $M^2$  area: 0 =  $M^1 \gg M^2$  ( $\geq 1.40$ ); 1 =  $M^1 > M^2$  ( $< 1.40, > 1.0$ ); 2 =  $M^1 \leq M^2$  ( $\leq 1.0$ ).
154. M7\*.  $M^{1-2}$  metaconule: 0 = absent; 1 = single; 2 = double.
155. M9\*.  $M^{1-2}$  preprotoconule: 0 = absent; 1 = weak; 2 = strong.
156. M10\*.  $M^1$  hypocone size: 0 = large; 1 = small; 2 = minute to absent.
157. M11\*.  $M^2$  hypocone size: 0 = large; 1 = small; 2 = minute to absent.
158. M12'\*.  $M^{1-2}$  hypocone position: 0 = distal, far lingual to protocone; 1 = distal, slightly lingual to protocone; 2 = distal, slightly buccal to protocone.
159. M13\*.  $M^{1-2}$  prehypocrista development: 0 = absent; 1 = weak; 2 = strong, reaches to postprotocrista, encloses the talon lingually.
160. M14.  $M^3$  prehypocrista development: 0 = absent; 1 = strong, reaches to postprotocrista, encloses the talon lingually.
161. M15.  $M^1$  or  $M^2$  paraconule position: 0 = attached to preprotocrista; 1 = unattached to preprotocrista.
162. M16\*.  $M^{1-2}$  metaconule: 0 = absent to indistinct; 1 = small; 2 = moderate; 3 = large.
163. M17'\*.  $M^{1-2}$  mesostyle size: 0 = absent to indistinct; 1 = moderate; 2 = strong.
164. M17''.  $M^{1-2}$  mesostyle position: 0 = attached to ectocrista; 1 = present on buccal cingulum.
165. M20\*.  $P^4$ - $M^1$  pericone: 0 = absent; 1 = small; 2 = large.
166. M22\*.  $M^{1-3}$  lingual cingulum development: 0 = absent to indistinct; 1 = weak, broken; 2 = strong, complete.
167. M24\*.  $M^{1-2}$  buccal cingulum development: 0 = absent to indistinct; 1 = weak; 2 = strong.
168. M27.  $M^{1-2}$  pre-metaconule cristae: 0 = absent or weak; 1 = strong
169. M28.  $M^{1-2}$  post-metaconule cristae: 0 = absent or weak; 1 = strong
170. M30\*.  $M^3$  paraconule: 0 = absent; 1 = small-moderate; 2 = large
171. M31\*. Molar protocone lingual inflation: 0 = not inflated; 1 = slightly inflated; 2 = very inflated.
172. M33\*.  $M^2$  buccal expansion of paracone (specify which tooth): 0 = no expansion; 1 = slight expansion; 2 = considerable expansion.
173. M34\*.  $M^3$  metacone: 0 = absent or very small; 1 = moderate (but smaller than paracone); 2 = large (equal to paracone).
174. M36\*.  $M^3$  hypocone: 0 = absent or very small; 1 = small; 2 = large.
175. M37\*.  $M^1$  paraconule size: 0 = absent; 1 = small-moderate (smaller than paracone); 2 = large (nearly as large as or larger than paracone).
176. M44\*.  $M^{1-3}$  anterior cingulum: 0 = strong, complete, long (connected to parastyle); 1 = strong, short; 2 = weak or absent.
177. M46\*.  $M^3$  size relative to  $M^1$ : 0 = very small (half the size of  $M^1$  or less); 1 = small (two thirds); 2 = large (approximately as large).
178. ML147\*.  $M^{1-2}$  metastyle: 0 = indistinct to absent; 1 = moderate; 2 = strong.
179. ML148\*.  $M^{1-2}$  parastyle: 0 = indistinct to absent; 1 = moderate; 2 = strong.
180. ML149.  $M^{1-2}$  parastyle position: 0 = mesial to paracone; 1 = mesiobuccal to paracone.
181. ML150.  $M^{1-2}$  metastyle position: 0 = distal to metacone; 1 = distobuccal to metacone.



182. ML151.  $M^{1-3}$  posterior cingulum: 0 = moderate, does not reach the metastyle; 1 = connected to metastyle.
183. ML152\*.  $M^{1-3}$  posterior margin (waisted between buccal and lingual cusps): 0 = indistinct to absent; 1 = present but shallow; 2 = present, deep.
184. ML153\*.  $M^{1-2}$  postparacrista: 0 = indistinct to absent; 1 = weakly developed; 2 = well developed (but well-marked notch between postparacrista and premetacrista); 3 = strongly elevated (weak notch between postparacrista and premetacrista).
185. ML154\*.  $M^{1-2}$  premetacrista: 0 = indistinct to absent; 1 = weakly developed; 2 = well developed (but well-marked notch between premetacrista and postparacrista); 3 = strongly elevated (weak notch between premetacrista and postparacrista).
186. ML155.  $M^{1-3}$  protocone arrangement: 0 = normal position; 1 = oblique.
187. ML156.  $M^{1-2}$  postprotocrista development: 0 = strong; 1 = tiny.
188. ML157\*.  $M^1$  postprotocrista length: 0 = indistinct to absent; 1 = short; 2 = long.
189. ML158\*.  $M^2$  postprotocrista length: 0 = indistinct to absent; 1 = short; 2 = long.
190. ML159.  $M^1$  postprotocrista direction: 0 = transverse, directed toward metaconule (or virtual metaconule emplacement); 1 = lateral, directed toward the lingual posterior cingulum (post-*protocone* fold-like).
191. ML160.  $M^2$  postprotocrista direction: 0 = transverse, directed toward metaconule (or virtual metaconule emplacement); 1 = lateral, directed toward lingual posterior cingulum (post-*protocone* fold-like).
192. ML161.  $M^1$  postprotocrista terminus: 0 = runs to base of metacone (with hypometacrista); 1 = runs to metaconule (at the level of the small or virtual metaconule); 2 = runs to posterior cingulum; 3 = limited at a point distal to protocone.
193. ML162.  $M^2$  postprotocrista terminus: 0 = runs to base of metacone (with hypometacrista); 1 = runs to metaconule (at the level of the small or virtual metaconule); 2 = runs to posterior cingulum; 3 = limited at a point distal to protocone.
194. ML163.  $M^{1-2}$  preprotocrista: 0 = low; 1 = elevated.
195. ML164.  $M^1$  preprotocrista connection (buccal side): 0 = connected to parastyle (by way of preparaconule crista); 1 = connected to paraconule (or near to it or to a virtual paraconule).
196. ML165.  $M^2$  preprotocrista connection (buccal side): 0 = connected to parastyle (by way of preparaconule crista); 1 = connected to paraconule (or near to it or to a virtual paraconule).
197. ML166\*.  $M^{1-2}$  postparaconule crista: 0 = indistinct to absent; 1 = moderate; 2 = well-developed (connected to paracone).
198. ML168\*.  $M^{1-2}$  hypometacrista: 0 = absent; 1 = weakly developed (low and short); 2 = well-developed (high).
199. ML169\*.  $M^{1-2}$  hypoparacrista: 0 = absent; 1 = weakly developed (short); 2 = well-developed (high).
200. MLN\*. Hypometaconulecrista: 0 = indistinct to absent; 1 = moderate (not connected to protocone); 2 = well-developed (connected to protocone or postprotocrista).

**Cranial characters:**

201. Cr 1. Transverse septum arising from the cochlear housing: 0 = Absent; 1 = present and forming the lateral wall of an anterior accessory cavity pneumatized from the tympanic cavity; 2 = present and forming the lateral wall of an anterior accessory cavity pneumatized from the epitympanic recess.
202. Cr 2. Extent of pneumatization of anterior accessory cavity: 0 = Anterior accessory cavity lies anterior to the tympanic cavity and is not trabeculated; 1 = anterior accessory cavity extends medial to the tympanic cavity, and is trabeculated.
203. Cr 3. Pneumatization of mastoid (from epitympanic recess?): 0 = absent; 1 = present.
204. Cr 4. Presence or absence of perbullar pathway: 0 = absent; 1 = present and formed exclusively by the petrosal bone.
205. Cr 5. Anteroposterior location of posterior carotid foramen in bulla: 0 = Posterior to line joining midpoints of tympanic bones; 1 = anterior to this line.
206. Cr 6\*. Mediolateral position of posterior carotid foramen in bulla: 0 = medial; 1 = midline of the bulla; 2 = lateral.
207. Cr 7. Ventrodorsal position of the carotid foramen in the bulla: 0 = dorsal, adjacent to basioccipital or mastoid bone; 1 = ventral.
208. Cr 8\*. Position of posterior carotid foramen relative to fenestra cochleae: 0 = posterior; 1 = ventral; 2 = anterior.
209. Cr 9. Position of the internal carotid canal relative to the fenestra cochleae: 0 = runs across ventral lip of the fenestra cochleae, shielding it from ventral view when a canal is present; 1 = internal carotid canal does not shield the fenestra cochleae from ventral view.
210. Cr 10. Position of the portion of the internal carotid/promontory artery (or its accompanying nerves) lying on the promontorium anterior to the fenestra cochleae: 0 = on ventrolateral surface of promontorium; 1 = contacting only the cupula of the cochlea.
211. Cr 11. Size of stapedial and promontory canals: 0 = both stapedial and promontory canals are large; 1 = stapedial slightly smaller than promontory; 2 = stapedial highly reduced or absent altogether; 3 = stapedial larger than promontory; 4 = both promontory and stapedial canals absent.
212. Cr 12. Morphology of promontory canal, when present: 0 = open trough; 1 = complete canal.
213. Cr 14. Position of ventral edge of the tympanic bone: 0 = intrabullar, or aphaneric; 1 = extrabullar or phaneric.
214. Cr 15. The shape of the tympanic bone: 0 = ribbon-like or only slightly expanded; 1 = laterally expanded into a collar or tube; ? = due to fusion with surrounding bones, of unknown shape.
215. Cr 16. Morphology of annular bridge: ? = This character is not analyzable in those taxa with an extrabullar tympanic, or those in which this region is not known; 0 = Linea semicircularis or partial annular bridge formed on a entotympanic bulla; 1 = linea semicircularis formed on a petrosal bulla; 2 = a complete annular bridge.
216. Cr 17. Encroachment of the auditory bulla on the pterygoid fossa: 0 = absent; 1 = present and formed by anterior accessory cavity; 2 = present and formed by the tympanic cavity.
217. Cr 18. Nature of contact between the lateral pterygoid plate and the bulla wall: 0 = absent; 1 = laminar; 2 = abutting.
218. Cr 19. Extent of contact between the lateral pterygoid plate and the bulla wall: 0 = slight; 1 = or very extensive.
219. Cr 20. Flange of basioccipital overlapping medial bulla wall: 0 = absent or minimal; 1 = extensive.
220. Cr 21. Suprameatal foramen: 0 = absent; 1 = present, small and in the posterior root of the zygomatic arch; 2 = present, large, and above the external auditory meatus.

221. Cr 22. Patent parotic fissure: 0 = present; 1 = absent.
222. Cr 23\*. Size of orbits: 0 = small; 1 = large; 2 = extremely large.
223. Cr 24\*. Postorbital closure: 0 = none; 1 = postorbital bar present; 2 = postorbital septum present.
224. Cr 25. Composition of the postorbital septum: 0 = zygomatic forms most of the septum; 1 = frontal forms most of the septum.
225. Cr 26. Zygomatic-lacrimal contact: 0 = present; 1 = absent.
226. Cr 27. Pronounced interorbital constriction: 0 = absent; 1 = present below olfactory tract.
227. Cr 28. Contact between lacrimal and palatine: 0 = present; 1 = separated by a large fronto-maxillary contact (and in some taxa, a small os planum of the ethmoid); 2 = separated by a large os planum.
228. Cr 29. Foramen rotundum: 0 = absent; 1 = present.
229. Cr 30. Position of lacrimal foramen: 0 = outside orbital margin; 1 = within the orbit or on the rim.
230. Cr 31. Metopic suture in adult: 0 = unfused; 1 = fused.
231. Cr 32. Orbital convergence: 0 = less convergent than primates; 1 = primate-like values for convergence.
232. Cr 33\*. Posterior nasal spine: 0 = reduced or absent; 1 = small but distinct; 2 = robust and long
233. Cr 34. Posterior palatine torus: 0 = present; 1 = absent.
234. Cr 35. Pyramidal processes: 0 = medially placed; 1 = laterally placed.
235. Cr 36\*. Length of medial pterygoid plate: 0 = long medial pterygoid plate extending one-third to one half of the distance to the anterior surface of the bulla; 1 = short but distinct from lateral pterygoid plate for its entire dorsoventral extent; 2 = medial pterygoid plate entirely absent, or reduced to a low rugosity.
236. Cr 37. Snout length: 0 = long snouts; 1 = short snouts.
237. Cr 38. Maxillary depth: 0 = deep; 1 = shallow.
238. Cr 39. Complete symphyseal fusion: 0 = absent; 1 = present.
239. Cr 40. Temporomandibular joint morphology: 0 = biconcave and transversely wide; 1 = anteroposteriorly oriented trough.
240. Cr 41. Entoglenoid process morphology: 0 = weak or absent; 1 = strong.
241. Cr 42. Inter-incisor diastema width: 0 = broad and wider than that of extant haplorhines; 1 = narrow, haplorhine-like.
242. Cr43. Coronoid height relative to condyle: 0 = very far above; 1 = slightly above or equal.
243. Cr44\*. Condyle height relative to toothrow: 0 = at level of tooth row; 1 = slightly above; 2 = well above tooth row.
244. Cr45. Corpus robusticity: 0 = shallow; 1 = deep.
245. Cr46. Zygomatico-parietal contact at pterion: 0 = no postorbital closure; 1 = zygomatico-parietal contact; 2 = alisphenoid-frontal contact.
246. Cr48. Epitympanic crest: 0 = absent; 1 = present.
247. Cr49. Broad ascending wing of premaxilla: 0 = narrow; 1 = broad.
248. Cr 50/301. Basioccipital stem: 0 = narrow; 1 = broad.
249. Cr51/302. Choanal shape: 0 = narrow; 1 = broad.
250. Cr52/292. Orientation of the mandibular symphysis: 0 = symphysis procumbent; 1 = symphysis erect.

## Postcranial characters:

### *Humerus*

251. H1\*. Shape of distal edge of the humeral trochlea: 0 = cylinder, distal edge perpendicular to shaft; 1 = distal edge somewhat angled to shaft; 2 = distal edge very angled.
252. H2. Relative heights of medial and lateral edges of humeral trochlea: 0 = subequal; 1 = medial edge more flared than lateral edge.
253. H3\*. Trochleocapitular ridge: 0 = absent; 1 = weak but distinct; 2 = moderately distinct; 3 = very distinct.
254. H4. Waisted trochlea (Minimum trochlear diameter/maximum trochlear diameter x 100): 0 = > 70 (unwaisted); 1 = ≤ 70 (waisted).
255. H5\*. Width of capitulum relative to trochlea (100 x ventral capitulum width/ventral trochlear width): 0 = < 100; 1 = between 100 and 140; 2 = 140-200; 3 = greater than 200.
256. H6. Entepicondylar foramen: 0 = present; 1 = variable; 2 = absent .
257. H7. Entepicondylar foramen position: 0 = above medial epicondyle; 1 = above ventral trochlea; 2 = above dorsal trochlea.
258. H8. Medial epicondyle size: 0 = reduced; 1 = prominent.
259. H9. Dorsal placement of medial epicondyle: 0 = parallel ; 1 = slight dorsal; 2 = large dorsal angle.
260. H10'\*. Shape of the lateral edge of the dorsal trochlea: 0 = not pronounced; 1 = moderately pronounced; 2 = very pronounced.
261. H10''\*. Shape of the medial edge of the dorsal trochlea: 0 = not pronounced; 1 = moderately pronounced; 2 = very pronounced.
262. H11\*. Dorsoepitrochlear fossa: 0 = present (strong); 1 = small, shallow; 2 = absent.
263. H12\*. Olecranon fossa shape: 0 = shallow; 1 = moderate; 2 = deep.
264. H14\*. Brachialis flange: 0 = broad; 1 = moderate; 2 = narrow.
265. H15. Bicipital groove morphology: 0 = shallow; 1 = deep.
266. H18/. Capitulartail: 0 = ventral articular width < 2.5 times the ventral capitular width; 1 = ventral articular width > 2.5 times the ventral capitular width.
267. H19'\*. Ratio of humerus length to femur length (H/F): 0 = 100\* H/F ≤ 65; 1 = H/F > 65, ≤ 80; 2 = H/F > 80.

### *Carpal bones*

268. W2. Ulnar-pisiform articulation: 0 = Facet on pisiform for ulnar styloid process is roughly equal in size to that for triquetrum; 1 = Facet on pisiform for ulnar styloid process is much enlarged and deeply excavated.

### *Os pelvis*

269. OP1/299. Gluteal tuberosity: 0 = present; 1 = absent.
270. OP2/300. Position of posterior gluteal tuberosity: 0 = Proximal to or level with lesser trochanter; 1 = distal to lesser trochanter.

### *Femur*

271. F1\*. Length of femoral neck: 0 = ≤ 75; 1 = 75-120; 2 = ≥ 120.
272. F2\*. Angle of femoral neck: 0 = < 60; 1 = 60-70; 2 = > 70.
273. F3. Angle of lesser trochanter: 0 = medial (0-30°); 1 = posterior (>30°)
274. F4\*. Size of third trochanter: 0 = large; 1 = small; 2 = low crest or absent.
275. F5\*. Knee index (Antero-posterior diameter of distal femur/ mediolateral diameter of distal femur ): 0 = < 90 (shallow knee); 1 = 90 – 100; 2 = > 100 (deep knee).

276. F6\*. Femoral head shape: 0 = spherical; 1 = semicylindrical; 2 = cylindrical.  
 277. F7. Anterior extension of greater trochanter: 0 = no extension; 1 = extension present.  
 278. F8. Anterior bend of proximal femur: 0 = none; 1 = bent  
 279. F9\*. Relative length of trochanteric fossa: 0 = long (> 125); 1 = moderate (110-125); 2 = very short (< 110).  
 280. F10. Presence of intertrochanteric crest: 0 = crest absent; 1 = crest present.  
 281. F11\*. Size of lesser trochanter: 0 = large; 1 = intermediate; 2 = small.  
 282. F12. Lateral rim of knee: 0 = low; 1 = high.

#### *Tibia*

283. T1'. Fusion of tibia and fibula: 0 = absent; 1 = present.  
 284. T1''\*. Articulation tibia/fibula: 0 = small; 1 = moderate; 2 = extensive.  
 285. T3. Shape of distal surface of tibia: 0 = square/parallel; 1 = triangular.  
 286. T4\*. Rotation of the medial malleolus: 0 = none; 1 = slight; 2 = strong.  
 287. T5\*. Shape of medial malleolar articular surface: 0 = flat; 1 = anteriorly convex, posteriorly flat; 2 = all convex.  
 288. T6. Shape of distal tibial shaft: 0 = no compression; 1 = anteroposteriorly compressed.  
 289. T7. Position of tibialis posterior groove: 0 = on medial side of malleolus; 1 = on posterior side of malleolus.

#### *Talus*

290. A1. Position of the flexor hallucis longus groove: 0 = lateral to trochlea; 1 = central to trochlea.  
 291. A2'\*. Shape of talo-fibular facet: 0 = steep-sided; 1 = steep-sided with a platar lip; 2 = sloped obliquely.  
 292. A4'\*. Development of the talar posterior trochlear shelf: 0 = none; 1 = weakly developed; 2 = well developed (prominent).  
 293. A5'. Talar neck length (NL/TL x 100): 0 = short (< 50); 1 = long (> 50).  
 294. A6. Medial talo-tibial facet: 0 = short (does not reach to plantar edge of bone); 1 = long.  
 295. A7/295. Lateral talar trochlear asymmetry: 0 = absent; 1 = present.  
 296. A8/296. Talar cotylar fossa: 0 = shallow; 1 = deep, medially projecting.  
 297. A9'/297. Width of the head of the talus (HW/HHT x 100): 0 = < 120; 1 = > 120.  
 298. GEB1\*. Talar neck angle: 0 = < 20°; 1 = 20-30°; 2 = > 30°.  
 299. GEB2\*. Talar body height (HT/MTRW x 100): 0 = < 100; 1 = 100-120; 2 = 120-150.  
 300. GEB3\*. TW/TL x 100: 0 = < 60; 1 = > 60.

#### *Calcaneus*

301. C1\*. Anterior calcaneal elongation: 0 = not elongate (ACL or anterior calcaneal ratio < 40); 1 = moderate (ACL ≥ .40-45); 2 = long (> .45).  
 302. C2\*. Position of the peroneal tubercle: 0 = distal to joint; 1 = at joint; 2 = proximal to joint.  
 303. C3. Posterior calcaneal bowing: 0 = absent; 1 = present.  
 304. C4/298. Calcaneo-cuboid articulation: 0 = articular wedge absent (fan-shaped); 1 = articular wedge present (more circular).

#### *Navicular*

305. N1\*. Length relative to width: 0 = short (<90); 1 = moderate (100-150); 2 = long (>150).  
 306. N3. Morphology of the naviculocuboid articulation: 0 = cuboid facet on navicular contacts only the ectocuneiform; 1 = cuboid facet contacts the ectocuneiform and mesocuneiform facet.

*Entocuneiform*

- 307. E1\*. Shape of Entocuneiform/MT1 articulation: 0 = dorsally reduced; 1 = dorsal moiety of joint enlarged relative to ventral moiety; 2 = dorsal moiety greatly enlarged.
- 308. E2. Lateral process of entocuneiform: 0 = small; 1 = hypertrophied.

*General Foot*

- 309. O1. Foot axis: 0 = mesaxonic; 1 = paraxonic; 2 = ectaxonic.
- 310. O2. Toilet claw: 0 = absent; 1 = present.
- 311. O3. Prehallux: 0 = present; 1 = absent.
- 312. O4. Metatarsus length: 0 = short; 1 = long.

*Metatarsal*

- 313. MT1\*. Peroneal tubercle of MTI: 0 = very large; 1 = large; 2 = small.
- 314. MT2. Hallux length: 0 = short; 1 = long.

**Visual system:**

- 315. V1/288. Optic fovea: 0 = absent; 1 = present.
- 316. V2/290. Tapetum lucidum: 0 = present; 1 = absent.

**Data Matrix**

Adapis                    1001010000 001201?012 2000011102 ??22100210 201100022?  
031100?214 30111????0 2010100100 00121330?1 11{23}1112200 0111220311 010?0?222?  
?100??1111 1220111101 1010101000 0220001100 000?022001 0020112110 0102201101  
1331000000 0?10020000 (13)000102000 101?001?0(01) 1101210100 ?011011100  
1011201100 010000?100 1000000010 1100122010 2201011211 1101??00?? 1?2?00

Cantius                    ?????????? ?????????? ???011102 112?1?0211 10110001?0  
0201100234 2011111?00 1010000120 0012222021 1130112220 0112220301 1?????????  
????????11? 1?10001?02 0001001000 0121022?00 020?0(12)2101 10101011{01}0  
0101100101 ?330000001 ?????????? ?????????? ?????????? ?????????? ??????????  
?????????? ?????????? ?????????? ?????????? 2201??1020 ?????????? ???????

Leptadapis                1??0?0?00 001201?110 2000011102 1022000210 1011000220  
010100?234 41111????0 2010200100 0011132021 2121112200 0102220301 1?????????  
??0??1110 2221011102 0010101000 0220001100 000?012001 0021112110 01012011(01)1  
1331000000 0?10020000 300010?00 101?????0? 1??12??100 ?????11?0 1031101111  
21000????? ?????????? ?????????? 2201001221 12??000?? 1?2?00

Absarokius                100102???? ?????00?0?? ?001001122 2?1300011(01) 1021011002  
20(12)000?000 5011(01)11110 101(01)100120 0012222021 1(01)00111120 0112222000  
1????????? ??????0110 3310000102 (01)101000000 0021022?00 010?01210(01)  
(12)110(01)10010 ?111101121 1310011001 ?????????? ?????????? ?????????? ??????????  
?????????? ?????????? ?????????? ?????????? ??02011111 1111??1110 110??????? ??????

Hemicodon                110113?0?2 {12}?1{12}10?2?? {01}001001112 2?231002(01)2  
2010010100 011111?233 001211101(01) 0(01)(12)2100120 0012122012 11{01}1112210  
00122(12)1210 1??1?????? ?0100011{01} 0?10000??2 00010(01)1000 012102{12}000  
020?(01)12112 1(01)20(12)0(12)110 1111101111 1320110000 ?????????? ??????????  
?????????? ?????????? ?????????? 103?101101 110??????? 0200211110 1101011011  
1111001110 110?2011?? 1?0???

Shoshonius 10?102???0 ???00?001 1001001111 1213101110 (01)001010002  
11211111(23)(12) 20111(01)(01)(01)0(01) 20(12)(12)(12)00120 0012222012 1130012210  
0111220200 1????????? ??????0110 11100(01)11?2 0011011000 0(01)?1022?00 0211112001  
0120102111 1101100221 1221000001 0?000200?0 010?221110 021?01???? 110011?011  
?01001?01? 10?001111 1100100?00 0200211110 ??02011101 1111000110 210???1???  
??0?00

'Teilharidina a' 110113???2 ???{01}0?000 100(01)001102 1213000111  
(12)011011000 1(01)110001(12)2 1011011110 1010000120 00122(23)(23)022  
1(01)10012220 011(12)2212(01)0 1????????? ???????11? (01)?10000?02 01110?1000  
0021022?00 010?02211(01) 1110(01)01110 1111100221 1221000001 ?????????? ??????????  
?????????? ?????????? ?????????? ?????????? ?????????? ?????????? ??????????  
200???????

Eosimias 1001000000 001002?000 2001001112 1213000110  
{01}0110(01)1011 1111000203 2211010000 0010000120 001(01)2(12)(12)1{12}2  
1100012210 0101111310 1????????? ???????11? ??00000??? 0111101000 ?0?0022?00  
000?022001 001011?111 1111001220 0111000110 ???????110 0????????? ??????????  
?????????? ?011?????1 1?2??0111? ?0?0?1???? ?????????? ??0001???1 1111011110  
01????????? ??2???

Phenacopithecus ??????000 0010?????? ????0011?2 2?13100110 {01}011010121  
11?100?33 2?11000000 1010000120 00112(12)2011 1111112210 0101111310 1?????????  
?????????1? 0?00?00??2 01111?10?0 ?021022000 000?022001 001011?211 1121100220  
01110001(01)0 ?????????? ?????????? ?0????????? ?????????? ?????????? ??????????  
?????????? ?????????? ?????????? ?????????? ?????????? ??????????

Bahinia 1?0?000000 001102?0? 200100110? 2?22?00001 10?1010100  
011112?{12}33 20???1?00 1?00001120 0?1023???1 1?0??12?20 01001??210 11?010?0?  
?01110110 1301(01)00102 01?0?01000 ?020022?0? ?00?02200? 00?01?111 1111100220  
0111000110 ?????????? ?????????? ?0??1???0? ???????0?? ???1??1??1 ??????????  
?????????? ?????????? ?????????? ?????????? ?????????? ??????????

Xanthorhysis ?????????? ??????1?0?? ?01001122 2?1?0?0111 10110100?1  
1011110103 1011100000 0010000110 00122330?2 0000012210 0112212200 1?????????  
?????????? ?????????? ?????????? ?????????? ?????????? ?????????? ??????????  
?????????? ?????????? ?????????? ?????????? ?????????? ?????????? ??????????  
?????????? ?????????? ?????????? ??????????

Aegyptopithecus 1000010010 0011012000 20011?1102 2?1?1?0200 10100100?1  
030101?330 12111????0 1010211000 (01)(01)02000010 0000111112 0111101000 2?????????  
??03110110 1?10001102 1100100220 0121100100 010?021000 1200{01}12010 ?101000100  
0111000110 101?011210 2110?00?00 102011??11 2211100101 1121201101 1010(01)00111  
1011012?01 ?0?(12)0?0?00 ?000?????1 1000111211 0101??21?? 0?2011

Moeripithecus ?????????? ?????????? ???11?1102 2?1?1?0201 10100111?1  
?20011?331 22111????0 1010211000 0001000010 1010111120 0111102000 1?????????  
??????0010 1?10001?02 0100100000 ?12000111? ?00?12100? (01)2??02?010 ?101100210  
0111000110 ?????????? ?????????? ?????????? ?????????? ?????????? ??????????  
?????????? ?????????? ?????????? ??????????

Apidium 1001010000 0012012000 2001001102 2?00001110 0111101012  
010000?131 121110???0 1020211101 1102000110 1000001110 1121212000 0?????????  
???1??1111 1110000000 00{01}0000000 0121200010 130?221002 1002211110 010110?00?  
???1000010 1111?0?210 2110?????? 1020?1??11 2????101?? ??1010???? 110(01)(12)02111  
1011010?1? 2112200001 0002011011 101000(01)221 01010021?? ??011

Catopithecus 1?0??10010 001??12000 20011?1101 110?1?0210 10100111?0  
0200111221 1211100?10 1010101010 0012111101 0000011120 0101103010 1100001101

0003100110 1?10000102 0101101000 0120011100 ?011022000 10100(01)1110 1111000220  
0111000110 ??1?001210 ??10???00 1020?1??11 2?1??10001 1020??1100 101?000111  
1011?12?01 1210?00000 0????????1 1010110211 ?????????? ???11

Parapithecus ?00101{01}000 001201?000 2001001102 2?01001110 0111101012  
020000?222 32000???0 1110211101 1102000110 1110011112 0121212000 0?????????  
???1????? ?????????? ?????????? ?????????? ?????????? ?????????? ??????????  
????????? ?????????? ?????????? ?????????? ?????????? ?????????? ??????????  
????????? ?????????? ?????????? ??????

Proteopithecus 1????????? ??????2??? 2001001122 1110100210 2010011121  
1201000112 211100???0 10(01)0100100 0012112(123)01 1000012210 0111113010  
2???1????? ?01110110 2010000002 0111101100 1011011100 ?{01}0?022000 0100010010  
0101100220 0111000?00 1111001210 ?110?00?00 ?02011??11 2211110001 1020?0101  
110?112111 1011?11?00 221010?0?1 0?????????1 0000000221 ?????????? ???11

Qatrania 2????????? ?????????? ???00110? 111?0??11? 01?11110?0  
1200000?(01) 021000???0 0010110110 0012000110 100001{01}112 0121210100  
1????????? ?????????? ?????????? ?????????? ?1?100?10? 020?02000? 1???10????  
?10?0000? ??01?0?00 ?????????? ?????????? ?????????? ?????????? ??????????  
????????? ?????????? ?????????? ?????????? ?????????? ??????

Simonsius 3????????? ?????1?000 2001001101 1?01001110 0110110001  
020011?230 22100???0 1010211101 1102000211 0000011111 0111112000 1?????????  
???1??1110 1110000000 1000000000 0211000100 120?02(12)001 1100110010 010110?00?  
???1000010 1111001??? 2110?0110? ?02011??11 2011010101 1?102?0101 ??????????  
?????1??1? ?????????? ?????????? ?????000??? ?????????? ???11

Biretia ?????????? ?????????? ???001102 211?100110 1111010020  
?101000233 ?211000?00 001010(01)010 00?20110(01)1 1000011121 010111(23)210  
1????????? ??????2111 1110000002 0110000110 0121000100 020?021001 0110111010  
010110100? 0?110001(01)0 ?????????? ?????????? ?????????? ?????????? ??????????  
????????? ?????????? ?????????? ?????????? ?????????? ??????

Dolichocebus 1????000? 0011?12000 2??1000012 2?12011211 2011010002  
000002?30 1??1?????0 0??0201100 0012022?11 1012?12?11 011111?010 ?1000?1000  
000111100? 0010000?02 0110100110 1{01}2000011? 000?021000 0111110110 0101100110  
0331000200 ?0????????? ?????????? ?02????????? ???????1?? ?????????? ??????????  
????????? ?????????? ???0????? ?????????? ???11

Branisella 110111?1?0 0?0?01?00? ?001000002 2?02101211 2000011101  
010001?220 0?111?????1 1000111100 0012222210 0011012120 0010113010 1?????????  
??????0000 0?10001??2 0110100000 1110000000 000?{01}20000 0000020120 0101100100  
0131000100 ?????????? ?????????? ?????????? ???????1?? ?????????? ??????????  
????????? ?????????? ?????????? ?????????? ??????

Myanmarpithecus ?????????? ?????1?0?? 2001001?2? ??2?00??1 ??1?01??01  
??{12}?????? ?112?????1 1012101100 00122331?1 0001211121 011(01)110011 2?????????  
?????????1? 0?10?01??1 110?000000 02210111?? 0111011000 1020101110 0101110110  
0111110100 ?????????? ?????????? ?????????? ???????0?? ??1????? ?????????? ??????????  
????????? ?????????? ?????????? ?????????? ??????

Pondaungia 1?0103?0?0 ???02?0?? 2001001102 11(12)2001100  
(12)010000101 12101012(23)(01) 0111(01)0???1 1012111110 11022{23}{23}0{12}0  
001{12}2111(12){01} 01(12)100(012)000 21???22?00 0001010110 1310000??1 0100000000  
012(01)01021? ?1(01)10(12)100? 121?001010 ?101110111 1331110220 ??????????  
????????? ?????????? ?????110?? ?11?????1 ?????????? ?????????? ?????????? ??????????  
1010001211 ?????????? ??????



Siamopithecus ?????????? ??????1?000 2001001102 2?1?0?0110 10000101?1  
111001?23(12) 21110????? 0011211000 0011222120 0011212120 0120000000 2?????????  
???1???110 1?10?00?2 (01)00000000 1010111121 ?00?000000 22?101000? ?101110111  
13310002(12)0 ?????????? ?????????? ?????????? ?????????? ????1????? ??????????  
?????????? ?????????? ?????????? ?????????? ?????????? ??????

Afrasia djijidae ?????????? ?????????? ?????????? ?????????? ??????????  
?????????? ?121?100? 1010?0?20 ?0121?2011 ?0?0012220 0101?13?10 1?????????  
?????????? ?????????? ?????????? ?1210?2?0? 010001201? 00???1?111 1113300220  
0011(12)(12)1222 ?????????? ?????????? ?????????? ?????????? ?????????? ??????????  
?????????? ?????????? ?????????? ?????????? ?????????? ??????

Afrotarsius libycus ?????????? ?????????? ?????????? ?????????? ??????????  
?????????? ?111?000? 1010?0?20 ?012?2011 ?0?0012220 0102?12?10 1?????????  
?????????? ?????????? ?????????? ?1?10?2?0? 0100?1001? 00???1?111 1113300?2?  
0?11?(12)2?22 ?????????? ?????????? ?????????? ?????????? ?????????? ??????????  
?????????? ?????????? ?????????? ?????????? ?????????? ??????

Tarsius 2??1???120 01?0010010 0001000122 2?1200011{01}  
{01}011010021 101111000(12) (01)111(01)0000 1010000120 001(12)2{23}{23}112  
0000011120 01{01}2111100 12002001?1 0111110110 0310100102 (01)101001000  
01210{12}{12}100 0{01}0?02(12)001 00201(01)2010 ?111100220 01110001{01}0  
1001121211 2111?11112 0221012101 2100110011 1110200011 0030201100 0200000000  
0200221120 111?011101 100100(01)000 1110201121 101111

**References**

1. Beard, K. C., L. Marivaux, Y. Chaimanee, J.-J. Jaeger, B. Marandat, P. Tafforeau, A. N. Soe, S. T. Tun, and A. A. Kyaw. 2009. A new primate from the Eocene Pondaung Formation of Myanmar and the monophyly of Burmese amphipithecids. *Proceedings of the Royal Society B-Biological Sciences* 276:3285-3294.
2. Kay, R. F., J. G. Fleagle, T. R. T. Mitchell, M. Colbert, T. Bown, and D. W. Powers. 2008. The anatomy of *Dolichocebus gaimanensis*, a stem platyrrhine monkey from Argentina. *Journal of Human Evolution* 54:323-382.
3. Swofford, D. L. 2003. PAUP\*. Phylogenetic Analysis Using Parsimony (\*and Other Methods). Version 4. Sinauer Associates, Sunderland, Massachusetts.
